# Supplementary material for: Quantifying the Evolutionary Conservation of Genes Encoding Multidrug Efflux Pumps in the ESKAPE Pathogens To Identify Antimicrobial Drug Targets
Source: PubMed Central journal article supplement (PMC5904435; doi:10.1128/msystems.00024-18), 2018-04-17
Supplement: sys003182224st2.pdf [file sys003182224st2.pdf]

**Table S2:** Polymorphism results for each gene in each species. n - number of individuals sampled, Sites - number of base pairs in each gene, MissingSites - number of sites with alignment gaps, S - number of segregating sites, InvarSites - number of invariant sites, Eta - total number of mutations, Hap - number of haplotypes Hd - haplotype diversity, VarHd - variance in haplotype diversity, Pi - Nucleotide diversity, AvNumDif - average pair wise nucleotide difference per sequence, ThetaNuc - estimated population mutation rate per site ThetaG - mutation parameter per sequence Zns - Zns statistic, G+Cn - GC content at noncoding positions, G+Gc - GC content at coding positions, G+Ctot - GC content, TajimaD - Tajima's D statistic, SigD - significance of Tajima's D, FuLiD\* - Fu and Li's D\* statistic, SigD\* - significance of Fu and Li's D\*, FuLiF\* - Fu and Li's F\* statistic, SigF - significance of Fu and Li's F\*, FuFs - Fu's Fs statistic

| Gene  | Organism   | Region | Ingroup | Outgroup | n  | Sites | NetSites | MissingSites | S    | InvarSites | Prop_Var | Eta | Hap  | Hd | VarHd | Pi      | VarPi    | AvNumDif | ThetaNuc | ThetaG   | Zns      | G+Cn    | G+Gc   | G+Ctot | TajimaD | SigD    | FuLiD* | SigD    | FuLiF* | SigF    | FuFs |        |
|-------|------------|--------|---------|----------|----|-------|----------|--------------|------|------------|----------|-----|------|----|-------|---------|----------|----------|----------|----------|----------|---------|--------|--------|---------|---------|--------|---------|--------|---------|------|--------|
| tolC  | Acinetobac | 1-1347 | 79      | 0        | 79 | 1347  | 1332     | 15           | 71   | 1261       | 0.053303 |     | 73   | 16 | 0.677 | 0.0033  | 0.00953  | n.d.     | 12.6946  | 0.011093 | 14.7764  | 0.1144  | 0.4082 | 0      | 0.4082  | -0.4691 | n.s.   | -0.7506 | n.s.   | -0.7647 | n.s. | 5.958  |
| macB  | Acinetobac | 1-1995 | 79      | 0        | 79 | 1995  | 1995     | 0            | 222  | 1773       | 0.111278 |     | 237  | 16 | 0.665 | 0.00348 | 0.012871 | n.d.     | 25.6774  | 0.024046 | 47.9726  | 0.20475 | 0.4475 | 0      | 0.4475  | -0.5993 | **     | -4.5744 | **     | -4.0028 | **   | 17.387 |
| macA  | Acinetobac | 1-1344 | 79      | 0        | 79 | 1344  | 867      | 477          | 61   | 806        | 0.070358 |     | 63   | 16 | 0.661 | 0.00337 | 0.01891  | n.d.     | 10.3096  | 0.014708 | 12.7522  | 0.1588  | 0.3993 | 0      | 0.3993  | -0.6331 | n.s.   | -1.0306 | n.s.   | -1.0457 | n.s. | 3.91   |
| adeB  | Acinetobac | 1-3294 | 79      | 0        | 79 | 3294  | 1093     | 2201         | 612  | 481        | 0.559927 |     | 762  | 19 | 0.665 | 0.00349 | 0.057182 | n.d.     | 62.4995  | 0.141117 | 154.241  | 0.4882  | 0.4393 | 0      | 0.4139  | -2.0685 | *      | 2.2337  | **     | 5.0011  | n.s. | 36.31  |
| adeJ  | Acinetobac | 1-3177 | 79      | 0        | 79 | 3177  | 3177     | 0            | 83   | 3094       | 0.026125 |     | 86   | 19 | 0.68  | 0.00337 | 0.003032 | n.d.     | 9.6323   | 0.005479 | 17.4078  | 0.0702  | 0.424  | 0      | 0.424   | -1.4977 | n.s.   | -1.7256 | n.s.   | -1.9593 | #    | 1.547  |
| adeG  | Acinetobac | 1-318C | 79      | 0        | 79 | 3180  | 3180     | 0            | 277  | 2903       | 0.087107 |     | 300  | 17 | 0.676 | 0.00326 | 0.019678 | n.d.     | 62.5771  | 0.019096 | 60.7248  | 0.137   | 0.4467 | 0      | 0.4467  | 0.1053  | n.s.   | 0.7067  | n.s.   | 0.5463  | n.s. | 40.899 |
| abeM  | Acinetobac | 1-1347 | 79      | 0        | 79 | 1347  | 837      | 510          | 32   | 805        | 0.038232 |     | 32   | 17 | 0.677 | 0.00328 | 0.009622 | n.d.     | 8.0532   | 0.007739 | 6.4773   | 0.1711  | 0.4032 | 0      | 0.4032  | 0.7661  | n.s.   | 1.0518  | n.s.   | 1.1276  | n.s. | 1.507  |
| craA  | Acinetobac | 1-144C | 79      | 0        | 79 | 1440  | 1038     | 402          | 418  | 620        | 0.402697 |     | 426  | 17 | 0.677 | 0.0033  | 0.017739 | n.d.     | 18.4135  | 0.083072 | 86.2292  | 0.8478  | 0.373  | 0      | 0.373   | -2.7247 | ***    | -8.7912 | **     | -7.4928 | **   | 9.836  |
| cmIA  | Acinetobac | 1-1470 | 79      | 0        | 79 | 1470  | 1008     | 462          | 728  | 280        | 0.722222 |     | 1000 | 20 | 0.681 | 0.0034  | 0.114718 | n.d.     | 115.6355 | 0.20081  | 202.416  | 0.3916  | 0.4462 | 0      | 0.4462  | -1.4927 | n.s.   | -1.2201 | n.s.   | -1.6031 | n.s. | 57.016 |
| florA | Acinetobac | 1-1372 | 79      | 0        | 79 | 1372  | 1055     | 317          | 744  | 311        | 0.705213 |     | 1024 | 19 | 0.681 | 0.0034  | 0.119361 | n.d.     | 125.926  | 0.196468 | 207.274  | 0.4338  | 0.4449 | 0      | 0.4449  | -1.3666 | n.s.   | 2.4317  | **     | 0.9902  | n.s. | 63.374 |
| tetA  | Acinetobac | 1-1552 | 79      | 0        | 79 | 1555  | 751      | 804          | 599  | 152        | 0.797603 |     | 952  | 17 | 0.776 | 0.00168 | 0.345732 | n.d.     | 259.6449 | 0.256591 | 192.7    | 0.3296  | 0.4448 | 0      | 0.4448  | 1.2093  | n.s.   | 2.4726  | **     | 2.327   | **   | n.d.   |
| amvA  | Acinetobac | 1-1512 | 79      | 0        | 79 | 1512  | 1218     | 294          | 163  | 1055       | 0.133826 |     | 175  | 19 | 0.692 | 0.00319 | 0.022754 | n.d.     | 27.7147  | 0.029083 | 35.4228  | 0.2046  | 0.4069 | 0      | 0.4069  | -0.7448 | n.s.   | 1.0026  | n.s.   | 0.3351  | n.s. | 14.526 |
| adeC  | Acinetobac | 1-1468 | 79      | 0        | 79 | 1468  | 1322     | 146          | 453  | 869        | 0.342663 |     | 512  | 18 | 0.665 | 0.00347 | 0.130489 | n.d.     | 172.5063 | 0.078394 | 103.637  | 0.6799  | 0.3873 | 0      | 0.3873  | 2.3056  | *      | 1.7783  | **     | 2.4013  | **   | n.d.   |
| adeK  | Acinetobac | 1-1468 | 79      | 0        | 79 | 1468  | 1400     | 68           | 443  | 957        | 0.316429 |     | 460  | 18 | 0.692 | 0.00319 | 0.014554 | n.d.     | 20.3759  | 0.066508 | 93.1114  | 0.8627  | 0.4231 | 0      | 0.4231  | -2.7081 | ***    | -6.6659 | **     | -7.3948 | **   | 10.258 |
| adeH  | Acinetobac | 1-1452 | 79      | 0        | 79 | 1452  | 1388     | 64           | 104  | 1284       | 0.074928 |     | 105  | 18 | 0.665 | 0.00347 | 0.094966 | n.d.     | 13.1392  | 0.015312 | 21.2537  | 0.1407  | 0.4444 | 0      | 0.4444  | -1.2894 | n.s.   | -2.9653 | *      | -2.7383 | *    | 4.618  |
| aceI  | Acinetobac | 1-577  | 79      | 0        | 79 | 577   | 358      | 219          | 162  | 196        | 0.452514 |     | 168  | 10 | 0.591 | 0.00352 | 0.026273 | n.d.     | 9.4057   | 0.094989 | 34.0059  | 0.8803  | 0.3504 | 0      | 0.3504  | -2.474  | **     | 2.1316  | **     | 0.2724  | n.s. | 9.074  |
| adeA  | Acinetobac | 1-1323 | 79      | 0        | 79 | 1323  | 3        | 1320         | 1    | 2          | 0.333333 |     | 1    | 2  | 0.184 | 0.00294 | 0.061452 | n.d.     | 0.1844   | 0.067472 | 0.2024   | n.a.    | 0.2996 | 0      | 0.2996  | -0.1075 | n.s.   | 0.5078  | n.s.   | 0.3781  | n.s. | 0.353  |
| adeF  | Acinetobac | 1-1992 | 79      | 0        | 79 | 1992  | 1977     | 15           | 175  | 1802       | 0.088518 |     | 179  | 19 | 0.773 | 0.00209 | 0.010179 | n.d.     | 20.124   | 0.018327 | 36.2325  | 0.196   | 0.4465 | 0      | 0.4465  | -1.5224 | n.s.   | -3.187  | *      | -2.9977 | *    | 8.936  |
| adel  | Acinetobac | 1-1251 | 79      | 0        | 79 | 1251  | 1248     | 3            | 17   | 1231       | 0.013622 |     | 17   | 13 | 0.669 | 0.00307 | 0.002471 | n.d.     | 3.0841   | 0.002757 | 3.4411   | 0.1404  | 0.4287 | 0      | 0.4287  | -0.3025 | n.s.   | -2.1324 | #      | -1.7528 | n.s. | -1.181 |
| qacE  | Acinetobac | 1-348  | 79      | 0        | 79 | 348   | 330      | 18           | 158  | 172        | 0.478788 |     | 180  | 14 | 0.709 | 0.0027  | 0.229768 | n.d.     | 75.8234  | 0.110409 | 36.4349  | 0.8164  | 0.4209 | 0      | 0.4209  | 3.7024  | ***    | 2.3565  | **     | 3.4976  | **   | 56.129 |
| smr1  | Acinetobac | 1-697  | 79      | 0        | 79 | 697   | 197      | 500          | 23   | 174        | 0.116751 |     | 23   | 11 | 0.641 | 0.00333 | 0.014785 | n.d.     | 2.9127   | 0.023632 | 4.6556   | 0.2392  | 0.4163 | 0      | 0.4163  | -1.1377 | n.s.   | -0.1081 | n.s.   | -0.5846 | n.s. | -0.228 |
| abeS  | Acinetobac | 1-340  | 79      | 0        | 79 | 340   | 330      | 0            | 46   | 284        | 0.139394 |     | 50   | 14 | 0.673 | 0.00317 | 0.020102 | n.d.     | 6.6336   | 0.030669 | 10.1208  | 0.4092  | 0.3527 | 0      | 0.3527  | -1.1237 | n.s.   | 1.2875  | n.s.   | 0.4072  | n.s. | 2.068  |
| cusF  | Enterobact | 1-409  | 53      | 0        | 53 | 409   | 238      | 171          | 170  | 68         | 0.714286 |     | 309  | 26 | 0.876 | 0.00137 | 0.208566 | n.d.     | 49.6386  | 0.286097 | 68.091   | 0.1691  | 0.4769 | 0      | 0.4769  | -0.977  | n.s.   | 0.3706  | n.s.   | -0.1774 | n.s. | 7.58   |
| mdtC  | Enterobact | 1-3397 | 53      | 0        | 53 | 3397  | 2791     | 606          | 1979 | 812        | 0.709065 |     | 3051 | 42 | 0.982 | 0.0001  | 0.125405 | n.d.     | 350.0065 | 0.240887 | 672.3161 | 0.2945  | 0.6129 | 0      | 0.6129  | -1.7447 | #      | -3.019  | *      | -3.0254 | *    | 8.882  |
| eefB  | Enterobact | 1-3178 | 53      | 0        | 53 | 3178  | 2051     | 1127         | 1136 | 915        | 0.553876 |     | 1800 | 40 | 0.978 | 0.00012 | 0.190179 | n.d.     | 390.0581 | 0.193392 | 396.6467 | 0.2391  | 0.6003 | 0      | 0.6003  | -0.0604 | n.s.   | -0.0156 | n.s.   | -0.0395 | n.s. | 13.288 |
| acrF  | Enterobact | 1-3152 | 53      | 0        | 53 | 3152  | 3103     | 49           | 1425 | 1678       | 0.459233 |     | 2345 | 41 | 0.981 | 0.0001  | 0.137895 | n.d.     | 427.8882 | 0.166553 | 516.7425 | 0.1333  | 0.5448 | 0      | 0.5448  | -0.6256 | n.s.   | 0.3891  | n.s.   | -0.0061 | n.s. | 12.444 |
| oxqB  | Enterobact | 1-3447 | 53      | 0        | 53 | 3447  | 2452     | 995          | 1697 | 755        | 0.692088 |     | 2556 | 41 | 0.981 | 0.0001  | 0.127416 | n.d.     | 312.4253 | 0.229706 | 563.2383 | 0.2744  | 0.5948 | 0      | 0.5948  | -1.6203 | #      | -1.3204 | n.s.   | -1.722  | n.s. | 9.374  |
| cusB  | Enterobact | 1-1533 | 53      | 0        | 53 | 1533  | 1091     | 442          | 784  | 307        | 0.718607 |     | 1361 | 33 | 0.951 | 0.00036 | 0.217141 | n.d.     | 236.9006 | 0.274894 | 299.909  | 0.2943  | 0.5164 | 0      | 0.5164  | -0.7636 | n.s.   | 0.4122  | n.s.   | -0.0528 | n.s. | 19.917 |
| mdtB  | Enterobact | 1-339C | 53      | 0        | 53 | 3390  | 2847     | 543          | 1741 | 1106       | 0.611521 |     | 2499 | 42 | 0.982 | 0.0001  | 0.113024 | n.d.     | 321.7787 | 0.193424 | 550.6778 | 0.3602  | 0.6116 | 0      | 0.6116  | -1.5124 | n.s.   | -2.6097 | *      | -2.6167 | *    | 8.163  |
| acrB  | Enterobact | 1-3151 | 53      | 0        | 53 | 3151  | 3110     | 41           | 1276 | 1834       | 0.410289 |     | 1860 | 42 | 0.985 | 0.00007 | 0.08537  | n.d.     | 265.4993 | 0.13179  | 409.8682 | 0.1856  | 0.5591 | 0      | 0.5591  | -1.281  | n.s.   | -1.4934 | n.s.   | -1.6909 | n.s. | 6.605  |
| acrD  | Enterobact | 1-3156 | 53      | 0        | 53 | 3156  | 3104     | 51           | 1541 | 1564       | 0.496296 |     | 2418 | 42 | 0.982 | 0.0001  | 0.133903 | n.d.     | 415.77   | 0.171603 | 532.8287 | 0.2062  | 0.5818 | 0      | 0.5818  | -0.7993 | n.s.   | 0.6557  | n.s.   | 0.1084  | n.s. | 10.417 |
| cusC  | Enterobact | 1-1641 | 53      | 0        | 53 | 1641  | 1094     | 547          | 858  | 236        | 0.784278 |     | 1516 | 34 | 0.957 | 0.00029 | 0.214798 | n.d.     | 234.9891 | 0.303346 | 331.861  | 0.225   | 0.5277 | 0      | 0.5277  | -1.0612 | n.s.   | 0.6971  | n.s.   | 0.0175  | n.s. | 17.856 |
| tolC  | Enterobact | 1-1682 | 53      | 0        | 53 | 1682  | 1200     | 482          | 737  | 463        | 0.614167 |     | 1000 | 42 | 0.982 | 0.0001  | 0.108477 | n.d.     | 130.172  | 0.183633 | 220.3593 | 0.3668  | 0.5535 | 0      | 0.5535  | -1.4862 | n.s.   | -2.799  | *      | -2.7441 | *    | 2.019  |
| eefC  | Enterobact | 1-1458 | 53      | 0        | 53 | 1458  | 1178     | 280          | 945  | 233        | 0.802207 |     | 1664 | 41 | 0.981 | 0.0001  | 0.272989 | n.d.     | 321.5813 | 0.311271 | 366.6778 | 0.2495  | 0.6079 | 0      | 0.6079  | -0.4472 | n.s.   | 1.054   | n.s.   | 0.5647  | n.s. | 9.643  |
| acrE  | Enterobact | 1-1196 | 53      | 0        | 53 | 1199  | 1131     | 68           | 643  | 488        | 0.568523 |     | 1084 | 40 | 0.977 | 0.00014 | 0.170355 | n.d.     | 192.6713 | 0.211202 | 238.8694 | 0.1496  | 0.5587 | 0      | 0.5587  | -0.7025 | n.s.   | 0.5336  | n.s.   | 0.065   | n.s. | 6.411  |
| mdtA  | Enterobact | 1-1466 | 53      | 0        | 53 | 1466  | 1015     | 445          | 651  | 364        | 0.641379 |     | 947  | 42 | 0.982 | 0.0001  | 0.124503 | n.d.     | 126.3701 | 0.205596 | 208.6802 | 0.3303  | 0.6061 | 0      | 0.6061  | -1.4321 | n.s.   | -2.2616 | #      | -3.2427 | #    | 1.867  |
| eefA  | Enterobact | 1-1218 | 53      | 0        | 53 | 1218  | 980      | 238          | 642  | 338        | 0.655102 |     | 1070 | 39 | 0.976 | 0.00014 | 0.231422 | n.d.     | 226.7939 | 0.240596 | 235.7844 | 0.2429  | 0.6076 | 0      | 0.6076  | -0.1385 | n.s.   | 1.0944  | n.s.   | 0.7385  | n.s. | 9.183  |
| oxqA  | Enterobact | 1-1262 | 53      | 0        | 53 | 1262  | 1005     | 257          | 660  | 345        | 0.656716 |     | 971  | 40 | 0.98  | 0.0001  | 0.143251 | n.d.     | 143.9673 | 0.212904 | 213.9688 | 0.3357  | 0.5904 | 0      | 0.5904  | -1.1879 | n.s.   | 0.2644  | n.s.   | -0.3578 | n.s. | 4.175  |
| cusA  | Enterobact | 1-3305 | 53      | 0        | 53 | 3309  | 3087     | 222          | 1678 | 1409       | 0.54357  |     | 2860 | 39 | 0.979 | 0.0001  | 0.230866 | n.d.     | 712.6843 | 0.204155 | 630.2275 | 0.275   | 0.5666 | 0      | 0.5666  | 0.4761  | n.s.   | 0.5484  | n.s.   | 0.6236  | n.s. | 22.78  |
| acrA  | Enterobact | 1-125C | 53      | 0        | 53 |       |          |              |      |            |          |     |      |    |       |         |          |          |          |          |          |         |        |        |         |         |        |         |        |         |      |        |

|         |            |        |     |   |     |      |      |      |      |      |          |      |    |       |         |          |      |         |          |          |        |        |   |        |              |              |              |         |
|---------|------------|--------|-----|---|-----|------|------|------|------|------|----------|------|----|-------|---------|----------|------|---------|----------|----------|--------|--------|---|--------|--------------|--------------|--------------|---------|
| opmD    | Pseudomo   | 1-1538 | 80  | 0 | 80  | 1538 | 1345 | 193  | 548  | 797  | 0.407435 | 594  | 34 | 0.947 | 0.00015 | 0.015666 | n.d. | 21.0706 | 0.089166 | 119.9278 | 0.6786 | 0.7264 | 0 | 0.7264 | -2.8593 ***  | -8.7116 **   | -7.4883 **   | -0.038  |
| opmE    | Pseudomo   | 1-1720 | 80  | 0 | 80  | 1720 | 1352 | 368  | 649  | 703  | 0.48003  | 738  | 41 | 0.97  | 0.00007 | 0.029493 | n.d. | 39.8741 | 0.112028 | 149.0012 | 0.5811 | 0.7121 | 0 | 0.7121 | -2.5435 ***  | -0.5934 n.s. | -1.7036 n.s. | 1.489   |
| oprA    | Pseudomo   | 1-1517 | 80  | 0 | 80  | 1517 | 1323 | 194  | 688  | 635  | 0.52003  | 813  | 36 | 0.956 | 0.00011 | 0.023844 | n.d. | 31.5462 | 0.124069 | 164.1436 | 0.4865 | 0.6899 | 0 | 0.6899 | -2.8067 ***  | -7.2639 **   | -6.4534 **   | 1.924   |
| oprJ    | Pseudomo   | 1-1495 | 80  | 0 | 80  | 1495 | 1400 | 95   | 592  | 808  | 0.422857 | 628  | 39 | 0.969 | 0.00005 | 0.017406 | n.d. | 24.3677 | 0.090566 | 126.7924 | 0.6395 | 0.6968 | 0 | 0.6968 | -2.803 ***   | -8.151 **    | -7.0701 **   | -1.068  |
| opmH    | Pseudomo   | 1-1493 | 80  | 0 | 80  | 1493 | 1431 | 62   | 90   | 1341 | 0.062893 | 101  | 30 | 0.933 | 0.00024 | 0.016257 | n.d. | 23.2639 | 0.01425  | 20.3918  | 0.2129 | 0.6802 | 0 | 0.6802 | 0.4744 n.s.  | -2.3988 *    | -1.4721 n.s. | 2.382   |
| czcC    | Pseudomo   | 1-1293 | 80  | 0 | 80  | 1293 | 1287 | 6    | 127  | 1160 | 0.098679 | 133  | 42 | 0.973 | 0.00005 | 0.007114 | n.d. | 9.1557  | 0.020864 | 26.8525  | 0.4023 | 0.7148 | 0 | 0.7148 | -2.2385 **   | -6.017 **    | -5.3537 **   | -16.667 |
| opmB    | Pseudomo   | 1-1500 | 80  | 0 | 80  | 1500 | 1497 | 3    | 82   | 1415 | 0.054776 | 83   | 43 | 0.972 | 0.00006 | 0.009218 | n.d. | 13.7997 | 0.011194 | 16.7576  | 0.1661 | 0.6958 | 0 | 0.6958 | -0.5902 n.s. | -3.3505 **   | -2.6795 *    | -10.105 |
| oprM    | Pseudomo   | 1-1458 | 80  | 0 | 80  | 1458 | 1457 | 1    | 75   | 1382 | 0.051476 | 76   | 36 | 0.956 | 0.00011 | 0.007236 | n.d. | 10.5424 | 0.010531 | 15.3443  | 0.1777 | 0.6851 | 0 | 0.6851 | -1.0424 n.s. | -3.9722 **   | -3.3483 **   | -7.485  |
| mexH    | Pseudomo   | 1-3201 | 80  | 0 | 80  | 3201 | 3034 | 167  | 1084 | 1950 | 0.357284 | 1155 | 52 | 0.98  | 0.00005 | 0.028957 | n.d. | 87.8554 | 0.07686  | 233.193  | 0.726  | 0.683  | 0 | 0.683  | -2.1684 **   | 0.9793 n.s.  | -0.4281 n.s. | 2.52    |
| mexX    | Pseudomo   | 1-1256 | 80  | 0 | 80  | 1256 | 1005 | 251  | 383  | 622  | 0.381095 | 407  | 38 | 0.967 | 0.00006 | 0.022181 | n.d. | 22.2918 | 0.081764 | 82.1728  | 0.6923 | 0.7255 | 0 | 0.7255 | -2.5205 ***  | 0.3391 n.s.  | -1.0387 n.s. | -1.276  |
| mexP    | Pseudomo   | 1-1274 | 80  | 0 | 80  | 1274 | 1003 | 271  | 426  | 577  | 0.424726 | 460  | 34 | 0.947 | 0.00014 | 0.018586 | n.d. | 18.6415 | 0.092596 | 92.8734  | 0.6332 | 0.6933 | 0 | 0.6933 | -2.7675 ***  | -7.8918 **   | -6.8797 **   | -0.836  |
| mexA    | Pseudomo   | 1-1391 | 80  | 0 | 80  | 1391 | 1014 | 377  | 389  | 625  | 0.383629 | 407  | 32 | 0.938 | 0.00021 | 0.055052 | n.d. | 55.8231 | 0.081038 | 82.1728  | 0.8319 | 0.6765 | 0 | 0.6765 | -1.1091 n.s. | 1.8814 **    | 0.7466 n.s.  | 12.495  |
| mexC    | Pseudomo   | 1-1225 | 80  | 0 | 80  | 1225 | 1001 | 224  | 402  | 599  | 0.401598 | 443  | 31 | 0.946 | 0.00014 | 0.017227 | n.d. | 17.2443 | 0.089352 | 89.4411  | 0.6574 | 0.7143 | 0 | 0.7143 | -2.794 ***   | -8.0048 **   | -6.9726 **   | -0.121  |
| mexM    | Pseudomo   | 1-1305 | 80  | 0 | 80  | 1305 | 1001 | 304  | 434  | 567  | 0.433566 | 468  | 25 | 0.919 | 0.00033 | 0.043719 | n.d. | 43.7627 | 0.094394 | 94.4886  | 0.6903 | 0.6902 | 0 | 0.6902 | -1.8591 *    | 0.4933 n.s.  | -0.5989 n.s. | 16.203  |
| triB    | Pseudomo   | 1-1071 | 80  | 0 | 80  | 1071 | 1071 | 0    | 90   | 981  | 0.084034 | 90   | 34 | 0.962 | 0.00006 | 0.006632 | n.d. | 7.1028  | 0.016966 | 18.1709  | 0.312  | 0.7083 | 0 | 0.7083 | -2.0432 *    | -6.179 **    | -5.3984 **   | -11.325 |
| triA    | Pseudomo   | 1-1173 | 80  | 0 | 80  | 1173 | 1104 | 69   | 88   | 1016 | 0.07971  | 90   | 28 | 0.932 | 0.0002  | 0.005972 | n.d. | 6.5927  | 0.016459 | 18.1709  | 0.4614 | 0.7079 | 0 | 0.7079 | -2.1374 *    | -6.4281 **   | -5.6218 **   | -6.273  |
| mexV    | Pseudomo   | 1-1131 | 80  | 0 | 80  | 1131 | 1116 | 15   | 101  | 1015 | 0.090502 | 105  | 29 | 0.951 | 0.00009 | 0.007619 | n.d. | 8.5032  | 0.018996 | 21.1994  | 0.4544 | 0.6676 | 0 | 0.6676 | -2.02 *      | -5.5906 **   | -4.958 **    | -4.403  |
| mexJ    | Pseudomo   | 1-1104 | 80  | 0 | 80  | 1104 | 1104 | 0    | 55   | 1049 | 0.049819 | 57   | 31 | 0.916 | 0.00045 | 0.006896 | n.d. | 7.6136  | 0.010424 | 11.5082  | 0.0984 | 0.7095 | 0 | 0.7095 | -1.1109 n.s. | -3.5854 **   | -3.1205 **   | -7.232  |
| czcB    | Pseudomo   | 1-1455 | 80  | 0 | 80  | 1455 | 1311 | 144  | 87   | 1224 | 0.066362 | 90   | 27 | 0.921 | 0.00033 | 0.004078 | n.d. | 5.3468  | 0.01386  | 18.1709  | 0.3605 | 0.7002 | 0 | 0.7002 | -2.3674 **   | -5.4315 **   | -5.0236 **   | -7.797  |
| muxA    | Pseudomo   | 1-1281 | 80  | 0 | 80  | 1281 | 1191 | 90   | 64   | 1127 | 0.053736 | 65   | 39 | 0.97  | 0.00005 | 0.004821 | n.d. | 5.7424  | 0.011019 | 13.1234  | 0.1678 | 0.6826 | 0 | 0.6826 | -1.8595 *    | -4.4252 **   | -4.076 **    | -22.517 |
| mexE    | Pseudomo   | 1-1245 | 80  | 0 | 80  | 1245 | 1146 | 99   | 50   | 1096 | 0.04363  | 51   | 30 | 0.9   | 0.00068 | 0.004528 | n.d. | 5.1892  | 0.008985 | 10.2968  | 0.1552 | 0.6945 | 0 | 0.6945 | -1.6174 #    | -3.3726 **   | -3.212 **    | -11.542 |
| emrE    | Pseudomo   | 1-333  | 80  | 0 | 80  | 333  | 327  | 6    | 28   | 299  | 0.085627 | 30   | 16 | 0.804 | 0.00106 | 0.009564 | n.d. | 3.1275  | 0.018523 | 6.057    | 0.6587 | 0.662  | 0 | 0.662  | -1.5111 n.s. | -5.2584 **   | -4.5857 **   | -3.072  |
| mexG    | Pseudomo   | 1-1256 | 80  | 0 | 80  | 1256 | 1005 | 251  | 383  | 622  | 0.381095 | 407  | 38 | 0.967 | 0.00006 | 0.022181 | n.d. | 22.2918 | 0.081764 | 82.1728  | 0.6923 | 0.7255 | 0 | 0.7255 | -2.5205 ***  | 0.3391 n.s.  | -1.0387 n.s. | -1.276  |
| sav1866 | Staphyloco | 1-1831 | 158 | 0 | 158 | 1831 | 1108 | 723  | 441  | 667  | 0.398014 | 460  | 30 | 0.811 | 0.00074 | 0.010341 | n.d. | 11.4577 | 0.073654 | 81.6089  | 0.8196 | 0.3432 | 0 | 0.3432 | -2.8037 ***  | -12.1817 **  | -9.1882 **   | 0.634   |
| mepA    | Staphyloco | 1-1356 | 158 | 0 | 158 | 1356 | 1356 | 0    | 96   | 1260 | 0.070796 | 103  | 31 | 0.811 | 0.00008 | 0.008881 | n.d. | 12.0422 | 0.013476 | 18.2733  | 0.0693 | 0.3292 | 0 | 0.3292 | -1.0777 n.s. | -3.3609 **   | -2.7899 *    | 0.631   |
| lmrS    | Staphyloco | 1-1520 | 158 | 0 | 158 | 1520 | 407  | 1113 | 200  | 207  | 0.4914   | 231  | 19 | 0.868 | 0.00015 | 0.01306  | n.d. | 24.9517 | 0.100692 | 40.9818  | 0.5471 | 0.3184 | 0 | 0.3184 | -1.2641 n.s. | 2.3797 **    | 0.7975 n.s.  | 24.331  |
| norA    | Staphyloco | 1-1522 | 158 | 0 | 158 | 1522 | 1088 | 434  | 497  | 591  | 0.456801 | 545  | 28 | 0.79  | 0.0006  | 0.033141 | n.d. | 36.0571 | 0.088868 | 96.6888  | 0.5937 | 0.3337 | 0 | 0.3337 | -2.0483 *    | -9.2032 **   | -6.8881 **   | 23.36   |
| norC    | Staphyloco | 1-1404 | 158 | 0 | 158 | 1404 | 1197 | 207  | 396  | 801  | 0.330827 | 445  | 31 | 0.862 | 0.0003  | 0.022769 | n.d. | 27.2546 | 0.065955 | 78.9477  | 0.6945 | 0.3659 | 0 | 0.3659 | -2.1349 *    | 0.8805 n.s.  | -0.6687 n.s. | 11.823  |
| norB    | Staphyloco | 1-1538 | 158 | 0 | 158 | 1539 | 1374 | 165  | 516  | 858  | 0.375546 | 614  | 38 | 0.832 | 0.00058 | 0.017753 | n.d. | 24.392  | 0.07928  | 108.9301 | 0.4612 | 0.3286 | 0 | 0.3286 | -2.5372 ***  | -7.368 **    | -6.0219 **   | 4.603   |
| sdrM    | Staphyloco | 1-1347 | 158 | 0 | 158 | 1347 | 447  | 900  | 104  | 343  | 0.232662 | 114  | 22 | 0.778 | 0.00073 | 0.052112 | n.d. | 23.294  | 0.045246 | 20.2248  | 0.5484 | 0.305  | 0 | 0.305  | 0.4814 n.s.  | 0.5682 n.s.  | 0.6337 n.s.  | 17.913  |
| mdeA    | Staphyloco | 1-1462 | 158 | 0 | 158 | 1462 | 1358 | 104  | 137  | 1221 | 0.100884 | 147  | 31 | 0.851 | 0.0004  | 0.010367 | n.d. | 14.0787 | 0.019204 | 26.0794  | 0.1223 | 0.3439 | 0 | 0.3439 | -1.4718 n.s. | -1.2287 n.s. | -1.6059 n.s. | 1.868   |
| tet38   | Staphyloco | 1-1359 | 158 | 0 | 158 | 1359 | 1353 | 6    | 72   | 1281 | 0.053215 | 76   | 24 | 0.827 | 0.00048 | 0.008003 | n.d. | 10.8279 | 0.009965 | 13.4832  | 0.1263 | 0.3197 | 0 | 0.3197 | -0.6139 n.s. | -3.9307 **   | -2.9511 *    | 2.74    |
