# Supplementary material for: Quantifying the Evolutionary Conservation of Genes Encoding Multidrug Efflux Pumps in the ESKAPE Pathogens To Identify Antimicrobial Drug Targets
Source: PubMed Central journal article supplement (PMC5904435; doi:10.1128/msystems.00024-18), 2018-04-17
Supplement: sys003182224st4.pdf [file sys003182224st4.pdf]

**Table S4:** Results from selection analyses; Stat: both p (proportion of sites which match each model of selection) and  $\omega$  ( $d_N/d_S$  ratio for the variable sites which fit into each model of selection) for Purifying, Neutral and Positive, p-value – probability value for likelihood ratio test statistic.

| Organism                     | Class     | Gene     | Stat     | Purifying | Neutral | Positive | p-value |
|------------------------------|-----------|----------|----------|-----------|---------|----------|---------|
| <i>Enterococcus faecium</i>  | ABC       | efrA     | p        | 0.753     | 0.039   | 0.208    | 1.000   |
|                              |           |          | $\omega$ | 0.379     | 1.000   | 1.000    |         |
|                              |           | efrB     | p        | 0.096     | 0.798   | 0.106    | 0.021   |
|                              |           |          | $\omega$ | 0.000     | 1.000   | 3.948    |         |
|                              | ABC       | msrC     | p        | 1.000     | 0.000   | 0.000    | 0.991   |
|                              |           |          | $\omega$ | 0.200     | 1.000   | 1.000    |         |
| MFS                          | efmA      | p        | 0.898    | 0.000     | 0.102   | 0.347    |         |
|                              |           | $\omega$ | 0.040    | 1.000     | 2.226   |          |         |
| <i>Staphylococcus aureus</i> | ABC       | sav1866  | p        | 0.588     | 0.000   | 0.412    | 0.215   |
|                              |           |          | $\omega$ | 0.338     | 1.000   | 1.522    |         |
|                              | MATE      | mepA     | p        | 0.957     | 0.038   | 0.005    | 0.010   |
|                              |           |          | $\omega$ | 0.043     | 1.000   | 4.825    |         |
|                              | MFS       | lmrS     | p        | 0.065     | 0.459   | 0.476    | 0.000   |
|                              |           |          | $\omega$ | 0.000     | 1.000   | 4.628    |         |
|                              |           | mdeA     | p        | 0.959     | 0.017   | 0.024    | 1.000   |
|                              |           |          | $\omega$ | 0.024     | 1.000   | 1.000    |         |
|                              |           | norA     | p        | 0.818     | 0.000   | 0.182    | 0.000   |
|                              |           |          | $\omega$ | 0.423     | 1.000   | 3.767    |         |
|                              |           | norB     | p        | 0.940     | 0.040   | 0.020    | 0.000   |
|                              |           |          | $\omega$ | 0.039     | 1.000   | 1.000    |         |
|                              |           | norC     | p        | 0.920     | 0.048   | 0.032    | 1.000   |
|                              |           |          | $\omega$ | 0.012     | 1.000   | 1.000    |         |
|                              |           | sdrM     | p        | 0.948     | 0.046   | 0.006    | 0.995   |
|                              |           |          | $\omega$ | 0.051     | 1.000   | 1.000    |         |
|                              | tet38     | p        | 0.973    | 0.024     | 0.003   | 0.184    |         |
|                              |           | $\omega$ | 0.022    | 1.000     | 8.087   |          |         |
| <i>Klebsiella pneumoniae</i> | Chaperone | cusF     | p        | 0.142     | 0.644   | 0.214    | 1.000   |
|                              |           |          | $\omega$ | 0.054     | 1.000   | 1.000    |         |
|                              | RND- IM   | acrB     | p        | 0.994     | 0.000   | 0.006    | 0.220   |
|                              |           |          | $\omega$ | 0.000     | 1.000   | 3.304    |         |

|                                |          |      |   |       |       |        |       |
|--------------------------------|----------|------|---|-------|-------|--------|-------|
|                                |          | acrD | p | 0.994 | 0.000 | 0.006  | 0.220 |
|                                |          |      | ω | 0.000 | 1.000 | 3.304  |       |
|                                |          | acrF | p | 0.994 | 0.000 | 0.006  | 0.220 |
|                                |          |      | ω | 0.000 | 1.000 | 3.304  |       |
|                                |          | cusB | p | 0.762 | 0.147 | 0.091  | 0.125 |
|                                |          |      | ω | 0.391 | 1.000 | 1.633  |       |
|                                |          | eefB | p | 0.994 | 0.000 | 0.006  | 0.220 |
|                                |          |      | ω | 0.000 | 1.000 | 3.304  |       |
|                                |          | mdtB | p | 0.986 | 0.000 | 0.014  | 0.482 |
|                                |          |      | ω | 0.029 | 1.000 | 1.649  |       |
|                                |          | mdtC | p | 0.986 | 0.000 | 0.014  | 0.482 |
|                                |          |      | ω | 0.029 | 1.000 | 1.649  |       |
|                                |          | oqxB | p | 0.996 | 0.004 | 0.000  | 1.000 |
|                                |          |      | ω | 0.008 | 1.000 | 44.246 |       |
|                                | RND - OM | cusC | p | 0.882 | 0.044 | 0.073  | 0.993 |
|                                |          |      | ω | 0.052 | 1.000 | 1.000  |       |
|                                |          | eefC | p | 0.882 | 0.054 | 0.063  | 1.000 |
|                                |          |      | ω | 0.052 | 1.000 | 1.000  |       |
|                                |          | tolC | p | 0.952 | 0.001 | 0.047  | 0.511 |
|                                |          |      | ω | 0.000 | 1.000 | 1.306  |       |
|                                | RND - PA | acrA | p | 1.000 | 0.000 | 0.000  | 0.996 |
|                                |          |      | ω | 0.048 | 1.000 | 1.000  |       |
|                                |          | acrE | p | 0.943 | 0.026 | 0.031  | 1.000 |
|                                |          |      | ω | 0.000 | 1.000 | 1.000  |       |
|                                |          | cusA | p | 0.714 | 0.270 | 0.016  | 0.222 |
|                                |          |      | ω | 0.268 | 1.000 | 2.477  |       |
|                                |          | eefA | p | 1.000 | 0.000 | 0.000  | 0.996 |
|                                |          |      | ω | 0.048 | 1.000 | 1.000  |       |
|                                |          | mdtA | p | 0.990 | 0.007 | 0.003  | 0.057 |
|                                |          |      | ω | 0.021 | 1.000 | 5.569  |       |
|                                |          | oqxA | p | 0.990 | 0.007 | 0.003  | 0.057 |
|                                |          |      | ω | 0.021 | 1.000 | 5.569  |       |
| <i>Acinetobacter baumannii</i> | ABC      | macA | p | 0.993 | 0.000 | 0.007  | 0.001 |
|                                |          |      | ω | 0.010 | 1.000 | 5.911  |       |
|                                |          | macB | p | 0.992 | 0.000 | 0.008  | 1.000 |
|                                |          |      | ω | 0.006 | 1.000 | 1.000  |       |
|                                |          | tolC | p | 0.953 | 0.000 | 0.047  | 0.510 |
|                                |          |      | ω | 0.001 | 1.000 | 1.315  |       |
|                                | MATE     | abeM | p | 1.000 | 0.000 | 0.000  | 0.986 |
|                                |          |      | ω | 0.046 | 1.000 | 1.000  |       |
|                                | MFS      | amvA | p | 0.945 | 0.047 | 0.008  | 1.000 |
|                                |          |      | ω | 0.008 | 1.000 | 1.000  |       |
|                                |          | cmlA | p | 0.247 | 0.747 | 0.006  | 0.048 |

|                               |          |      |   |       |       |        |       |
|-------------------------------|----------|------|---|-------|-------|--------|-------|
|                               |          |      | ω | 0.289 | 1.000 | 14.817 |       |
|                               |          | craA | p | 0.024 | 0.938 | 0.037  | 0.000 |
|                               |          |      | ω | 0.000 | 1.000 | 31.779 |       |
|                               |          | floR | p | 0.389 | 0.577 | 0.034  | 0.298 |
|                               |          |      | ω | 0.457 | 1.000 | 2.712  |       |
|                               |          | tetA | p | 0.393 | 0.286 | 0.321  | 1.000 |
|                               |          |      | ω | 0.319 | 1.000 | 1.000  |       |
|                               | PACE     | acel | p | 0.000 | 0.002 | 0.998  | 0.033 |
|                               |          |      | ω | 1.000 | 1.000 | 2.090  |       |
|                               | RND-IM   | adeB | p | 0.351 | 0.614 | 0.035  | 0.000 |
|                               |          |      | ω | 0.168 | 1.000 | 20.736 |       |
|                               |          | adeG | p | 0.996 | 0.004 | 0.000  | 0.996 |
|                               |          |      | ω | 0.008 | 1.000 | 30.383 |       |
|                               |          | adeJ | p | 0.994 | 0.000 | 0.006  | 0.220 |
|                               |          |      | ω | 0.000 | 1.000 | 3.304  |       |
|                               | RND - OM | adeC | p | 0.882 | 0.060 | 0.058  | 0.995 |
|                               |          |      | ω | 0.052 | 1.000 | 1.000  |       |
|                               |          | adeH | p | 0.994 | 0.000 | 0.006  | 1.000 |
|                               |          |      | ω | 0.069 | 1.000 | 1.042  |       |
|                               |          | adeK | p | 0.914 | 0.079 | 0.007  | 0.000 |
|                               |          |      | ω | 0.055 | 1.000 | 10.754 |       |
|                               | RND - PA | adeA | p | 0.390 | 0.544 | 0.066  |       |
|                               |          |      | ω | 0.357 | 1.000 | 4.957  |       |
|                               |          | adeF | p | 0.959 | 0.000 | 0.041  | 0.004 |
|                               |          |      | ω | 0.040 | 1.000 | 2.230  |       |
|                               |          | adeI | p | 1.000 | 0.000 | 0.000  | 0.996 |
|                               |          |      | ω | 0.048 | 1.000 | 1.000  |       |
|                               | SMR      | abeS | p | 1.000 | 0.000 | 0.000  | 0.994 |
|                               |          |      | ω | 0.038 | 1.000 | 1.000  |       |
|                               |          | qacE | p | 0.907 | 0.001 | 0.092  | 1.000 |
|                               |          |      | ω | 0.023 | 1.000 | 1.000  |       |
|                               |          | smr1 | p | 0.977 | 0.000 | 0.023  | 0.904 |
|                               |          |      | ω | 0.000 | 1.000 | 1.127  |       |
| <i>Pseudomonas aeruginosa</i> | MATE     | pmpM | p | 0.961 | 0.039 | 0.000  | 0.990 |
|                               |          |      | ω | 0.015 | 1.000 | 19.981 |       |
|                               | MFS      | tetA | p | 0.100 | 0.780 | 0.120  | 0.998 |
|                               |          |      | ω | 0.051 | 1.000 | 1.000  |       |
|                               | RND - IM | czcA | p | 0.111 | 0.870 | 0.020  | 0.000 |
|                               |          |      | ω | 0.000 | 1.000 | 27.662 |       |
|                               |          | mexB | p | 0.119 | 0.713 | 0.167  | 0.000 |
|                               |          |      | ω | 0.074 | 1.000 | 5.964  |       |
|                               |          | mexD | p | 0.963 | 0.014 | 0.023  | 1.000 |
|                               |          |      | ω | 0.017 | 1.000 | 1.000  |       |

|          |      |   |       |       |        |       |
|----------|------|---|-------|-------|--------|-------|
|          | mexF | p | 0.830 | 0.004 | 0.167  | 0.000 |
|          |      | ω | 1.000 | 1.000 | 6.627  |       |
|          | mexI | p | 0.579 | 0.000 | 0.421  | 0.000 |
|          |      | ω | 0.735 | 1.000 | 5.830  |       |
|          | mexK | p | 0.016 | 0.925 | 0.059  | 0.000 |
|          |      | ω | 0.000 | 1.000 | 21.320 |       |
|          | mexN | p | 0.491 | 0.501 | 0.008  | 0.000 |
|          |      | ω | 0.145 | 1.000 | 20.268 |       |
|          | mexQ | p | 0.152 | 0.831 | 0.017  | 0.000 |
|          |      | ω | 0.000 | 1.000 | 32.732 |       |
|          | mexW | p | 0.988 | 0.010 | 0.002  | 0.000 |
|          |      | ω | 0.010 | 1.000 | 29.398 |       |
|          | mexY | p | 0.079 | 0.870 | 0.050  | 0.000 |
|          |      | ω | 0.000 | 1.000 | 14.897 |       |
|          | muxB | p | 0.478 | 0.516 | 0.007  | 0.000 |
|          |      | ω | 0.071 | 1.000 | 39.801 |       |
|          | muxC | p | 0.460 | 0.530 | 0.010  | 0.000 |
|          |      | ω | 0.131 | 1.000 | 20.982 |       |
|          | triC | p | 0.997 | 0.000 | 0.003  | 0.071 |
|          |      | ω | 0.003 | 1.000 | 3.142  |       |
| RND - OM | czcC | p | 0.978 | 0.022 | 0.000  | 1.000 |
|          |      | ω | 0.026 | 1.000 | 1.000  |       |
|          | opmB | p | 0.989 | 0.011 | 0.000  | 1.000 |
|          |      | ω | 0.019 | 1.000 | 31.000 |       |
|          | opmD | p | 0.077 | 0.522 | 0.401  | 0.000 |
|          |      | ω | 0.000 | 1.000 | 4.870  |       |
|          | opmE | p | 0.078 | 0.852 | 0.070  | 0.000 |
|          |      | ω | 0.000 | 1.000 | 12.094 |       |
|          | opmH | p | 0.971 | 0.014 | 0.015  | 1.000 |
|          |      | ω | 0.017 | 1.000 | 1.000  |       |
|          | oprA | p | 0.187 | 0.540 | 0.273  | 0.000 |
|          |      | ω | 0.158 | 1.000 | 6.158  |       |
|          | oprJ | p | 0.408 | 0.304 | 0.287  | 0.980 |
|          |      | ω | 0.097 | 1.000 | 1.000  |       |
|          | oprM | p | 1.000 | 0.000 | 0.000  | 0.954 |
|          |      | ω | 0.009 | 1.000 | 44.829 |       |
|          | oprN | p | 0.043 | 0.873 | 0.085  | 0.000 |
|          |      | ω | 0.000 | 1.000 | 23.774 |       |
| RND - PA | czcB | p | 0.975 | 0.010 | 0.014  | 1.000 |
|          |      | ω | 0.009 | 1.000 | 1.000  |       |
|          | mexA | p | 0.282 | 0.218 | 0.500  | 0.000 |
|          |      | ω | 0.907 | 1.000 | 14.201 |       |
|          | mexC | p | 0.438 | 0.537 | 0.025  | 0.000 |
|          |      | ω | 0.082 | 1.000 | 15.131 |       |

|                                    |               |          |      |       |       |        |       |       |
|------------------------------------|---------------|----------|------|-------|-------|--------|-------|-------|
|                                    |               | mexE     | p    | 1.000 | 0.000 | 0.000  | 0.966 |       |
|                                    |               |          | ω    | 0.021 | 1.000 | 1.000  |       |       |
|                                    |               | mexH     | p    | 0.079 | 0.870 | 0.050  | 0.000 |       |
|                                    |               |          | ω    | 0.000 | 1.000 | 14.897 |       |       |
|                                    |               | mexJ     | p    | 0.972 | 0.025 | 0.003  | 0.010 |       |
|                                    |               |          | ω    | 0.026 | 1.000 | 25.004 |       |       |
|                                    |               | mexM     | p    | 0.803 | 0.143 | 0.054  | 0.987 |       |
|                                    |               |          | ω    | 0.139 | 1.000 | 1.000  |       |       |
|                                    |               | mexP     | p    | 0.207 | 0.772 | 0.021  | 0.000 |       |
|                                    |               |          | ω    | 0.000 | 1.000 | 17.679 |       |       |
|                                    |               | mexV     | p    | 0.962 | 0.015 | 0.023  | 1.000 |       |
|                                    |               |          | ω    | 0.015 | 1.000 | 1.000  |       |       |
|                                    |               | mexX     | p    | 0.090 | 0.786 | 0.123  | 0.000 |       |
|                                    |               |          | ω    | 0.000 | 1.000 | 11.739 |       |       |
|                                    |               | mexA     | p    | 0.996 | 0.000 | 0.004  | 0.122 |       |
|                                    |               |          | ω    | 0.030 | 1.000 | 3.720  |       |       |
|                                    |               | triA     | p    | 0.960 | 0.028 | 0.012  | 0.002 |       |
|                                    |               |          | ω    | 0.025 | 1.000 | 6.211  |       |       |
|                                    |               | triB     | p    | 0.959 | 0.020 | 0.021  | 1.000 |       |
|                                    |               |          | ω    | 0.026 | 1.000 | 1.000  |       |       |
|                                    | RND – Unknown | mexG     | p    | 0.463 | 0.409 | 0.128  | 0.000 |       |
|                                    |               |          | ω    | 1.000 | 1.000 | 12.295 |       |       |
|                                    | SMR           | emrE     | p    | 0.977 | 0.009 | 0.014  | 1.000 |       |
|                                    |               |          | ω    | 0.010 | 1.000 | 1.000  |       |       |
| <i>Enterobacter</i><br><i>spp.</i> | Chaperone     | cusF     | p    | 0.716 | 0.216 | 0.068  | 0.997 |       |
|                                    |               |          | ω    | 0.108 | 1.000 | 1.000  |       |       |
|                                    | RND - IM      | acrB     | p    | 0.746 | 0.244 | 0.010  | 0.000 |       |
|                                    |               |          | ω    | 0.067 | 1.000 | 3.436  |       |       |
|                                    |               | acrD     | p    | 0.962 | 0.033 | 0.005  | 0.992 |       |
|                                    |               |          | ω    | 0.021 | 1.000 | 1.000  |       |       |
|                                    |               | acrF     | p    | 0.202 | 0.488 | 0.310  | 0.000 |       |
|                                    |               |          | ω    | 0.056 | 1.000 | 2.700  |       |       |
|                                    |               | cusB     | p    | 0.469 | 0.265 | 0.266  | 1.000 |       |
|                                    |               |          | ω    | 0.200 | 1.000 | 1.000  |       |       |
|                                    |               | eefB     | p    | 0.119 | 0.483 | 0.399  | 0.000 |       |
|                                    |               |          | ω    | 0.042 | 1.000 | 2.914  |       |       |
|                                    |               | mdtB     | p    | 0.612 | 0.324 | 0.064  | 0.000 |       |
|                                    |               |          | ω    | 0.173 | 1.000 | 2.492  |       |       |
|                                    |               | mdtC     | p    | 0.108 | 0.530 | 0.362  | 0.000 |       |
|                                    |               |          | ω    | 0.151 | 1.000 | 3.693  |       |       |
|                                    |               | oqxB     | p    | 0.366 | 0.476 | 0.159  | 0.000 |       |
|                                    |               |          | ω    | 0.197 | 1.000 | 2.655  |       |       |
|                                    |               | RND - OM | cusC | p     | 0.120 | 0.602  | 0.278 | 0.000 |

|          |      |   |       |       |       |       |
|----------|------|---|-------|-------|-------|-------|
|          |      | ω | 0.172 | 1.000 | 2.228 |       |
|          | eefC | p | 0.808 | 0.126 | 0.065 | 0.988 |
|          |      | ω | 0.162 | 1.000 | 1.000 |       |
|          | tolC | p | 0.604 | 0.227 | 0.169 | 0.000 |
|          |      | ω | 0.250 | 1.000 | 2.532 |       |
| RND - PA | acrA | p | 0.704 | 0.205 | 0.091 | 1.000 |
|          |      | ω | 0.091 | 1.000 | 1.000 |       |
|          | acrE | p | 0.024 | 0.264 | 0.712 | 0.000 |
|          |      | ω | 0.000 | 1.000 | 3.245 |       |
|          | cusA | p | 0.675 | 0.210 | 0.115 | 1.000 |
|          |      | ω | 0.098 | 1.000 | 1.000 |       |
|          | eefA | p | 0.229 | 0.678 | 0.093 | 0.000 |
|          |      | ω | 0.079 | 1.000 | 2.257 |       |
|          | mdtA | p | 0.064 | 0.639 | 0.298 | 0.000 |
|          |      | ω | 0.014 | 1.000 | 3.607 |       |
|          | oqxA | p | 0.560 | 0.425 | 0.015 | 0.001 |
|          |      | ω | 0.201 | 1.000 | 3.823 |       |
